# Supplementary material for: Comprehensive analysis of gene expression patterns in Friedreich's ataxia fibroblasts by RNA sequencing reveals altered levels of protein synthesis factors and solute carriers
Source: PubMed Central journal article supplement (PMC5719256; doi:10.1242/dmm.030536), 2017-11-01
Supplement: dmm-10-030536-s1.pdf [file dmm-10-030536-s1.pdf]

**Fig. S1. Determination of intra-group heterogeneity and outlier analysis.** First, it was determined if any of the samples is an outlier in terms of basic quality, such as % of bases with quality score  $\geq 30$  (A), mean quality score (B), number of fragments mapped (C), and % of fragments mapped to exons (D). No samples were determined to be outliers (defined as outside 1.5 times the interquartile range above the upper quartile and below the lower quartile), except one sample with relatively lower % of fragments mapped to exons (D). As the % of fragments mapped to exons for this sample is still as high as 71%, this sample was considered acceptable and was not removed from the analysis. Next, PCA plots were generated for the samples in each group separately (E, F). By visual inspection, no outliers were identified. To statistically evaluate if any of the sample is an outlier within groups, the median spearman distance of each sample to rest of the samples in the same group was calculated (G, H) and boxplots were generated for the two groups (I, J). Again, no outliers were identified within either group.

**Fig. S2, Napierala et al.**

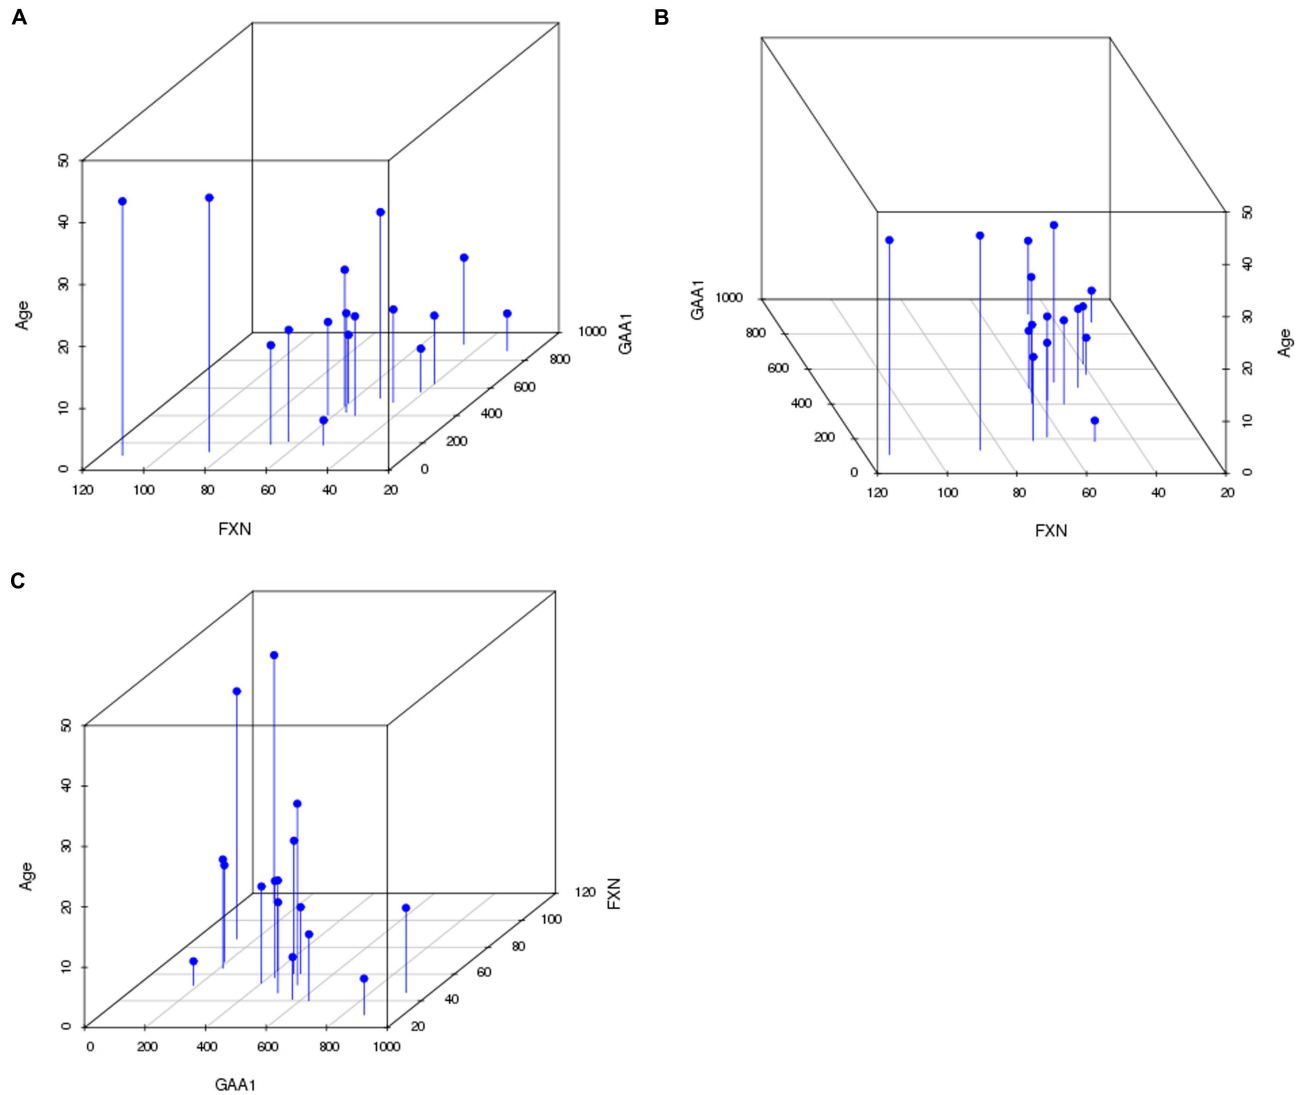

**Fig. S2. Correlation of GAA repeat length, FXN expression, and age of onset as determined from FRDA fibroblasts.** Shown are three-dimensional plots of GAA1 repeat length on the x-axis (GAA1), age of disease onset on the y-axis (age), and *FXN* expression by RNA sequencing on the z-axis (FXN) for each FRDA fibroblast sample. The viewing angles shown are (A) 220°, (B) 300°, and (C) 40°.

Fig. S3, Napierala et al.

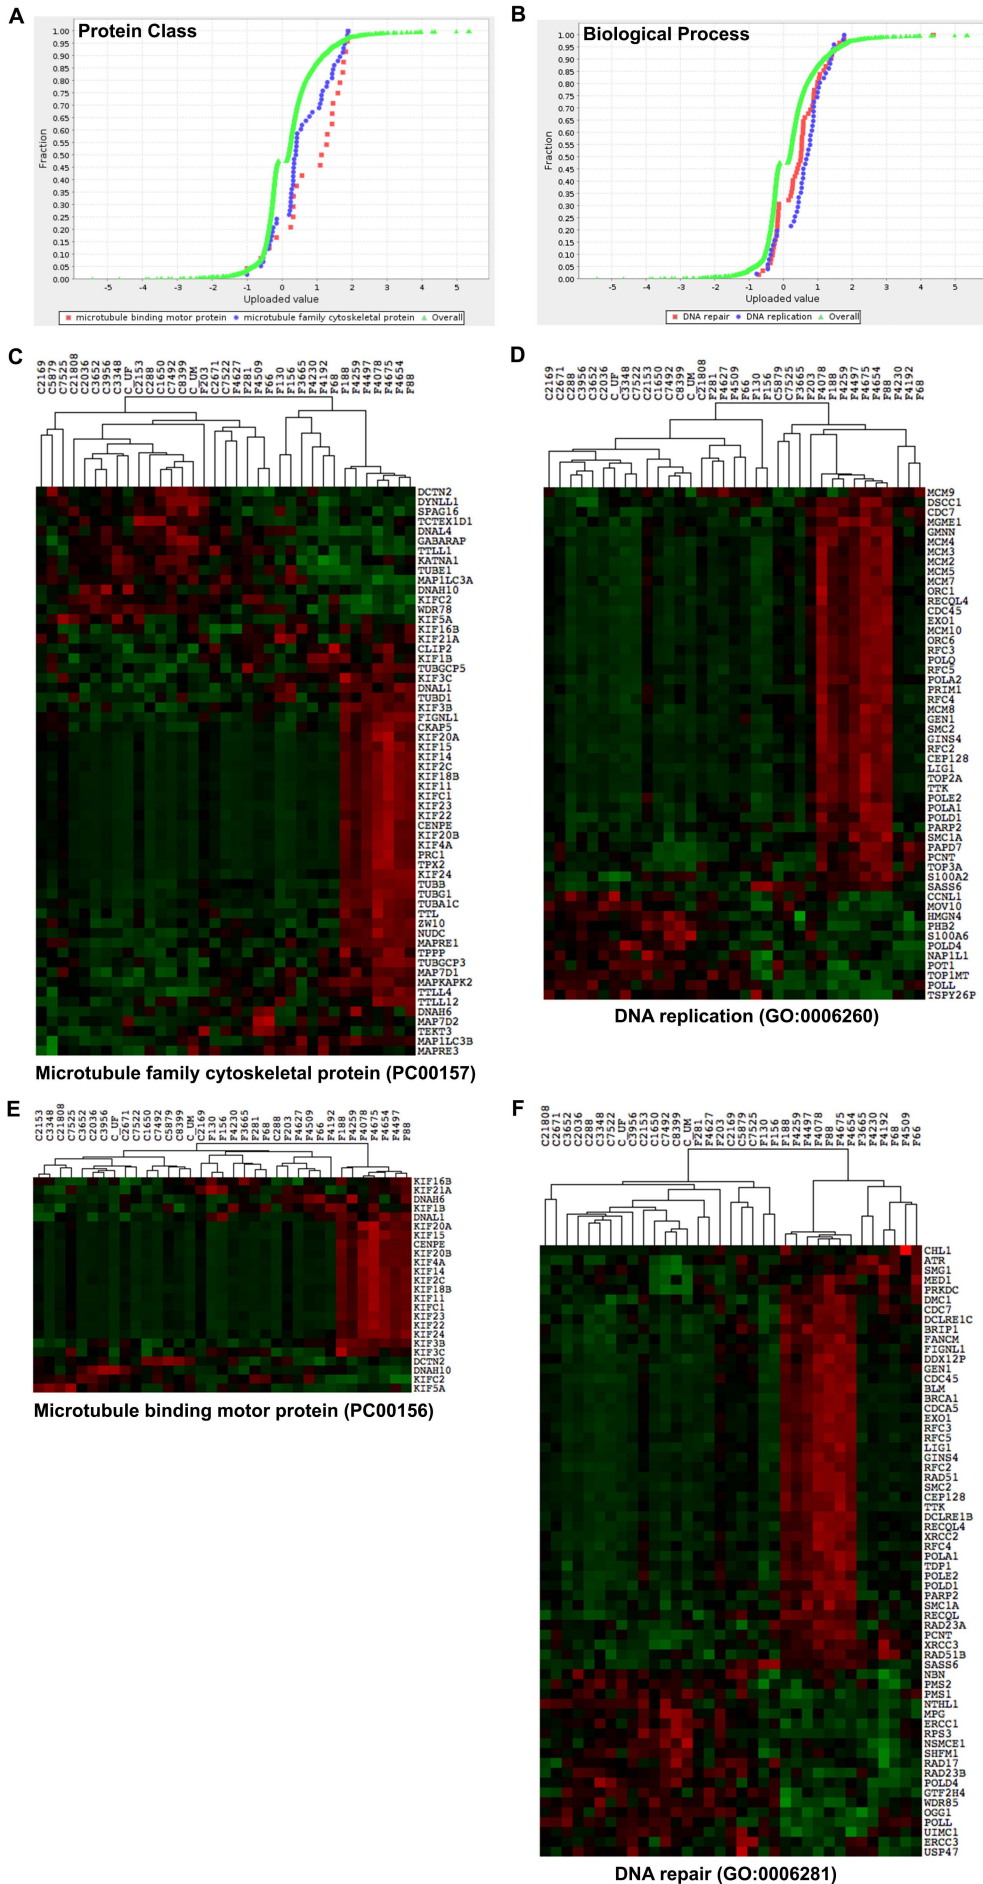

**Fig. S3. Statistical enrichment analysis for significantly changed genes in FRDA fibroblasts.** Plots were generated from the PANTHER statistical enrichment test tool using the list of 3,788 significantly changed genes and their associated log<sub>2</sub> ratio values. (A) Genes mapped to the PANTHER Protein Class categories microtubule binding motor protein (PC00156) and microtubule family cytoskeletal protein (PC00157) are plotted in red and blue, respectively, with the overall distribution of expression for the 3,788 genes shown in green. (B) Genes mapped to the PANTHER GO-Slim Biological Process categories DNA repair (GO: 0006281) and DNA replication (GO: 0006260) are plotted in red and blue, respectively, with the overall distribution of expression for the 3,788 genes shown in green. (C) The normalized DESeq counts were used to generate an expression heatmap for 58 genes mapped to microtubule family cytoskeletal protein (PC00157). The CTRL and FRDA fibroblast samples are arranged hierarchically. (D) The normalized DESeq counts were used to generate an expression heatmap for 52 genes mapped to DNA replication (GO: 0006260). The CTRL and FRDA fibroblast samples are arranged hierarchically. (E) The normalized DESeq counts were used to generate an expression heatmap for 24 genes mapped to microtubule binding motor protein (PC00156). The CTRL and FRDA fibroblast samples are arranged hierarchically. (F) The normalized DESeq counts were used to generate an expression heatmap for 62 genes mapped to DNA repair (GO: 0006281). The CTRL and FRDA fibroblast samples are arranged hierarchically.

**Fig. S4, Napierala et al.**

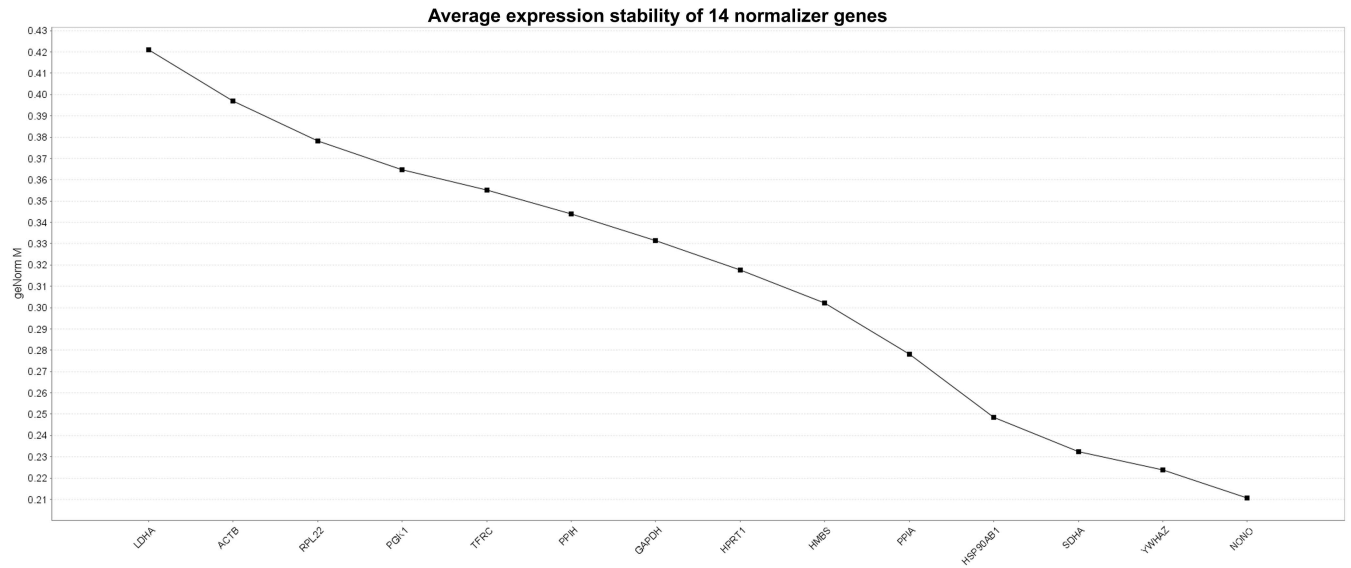

**Fig. S4. GeNorm/qbase+ analysis of normalizer candidates for FRDA gene expression studies.** A GeNorm M plot is shown with the Y axis indicating the average expression stability of the 14 normalizer genes that are not statistically different between CTRL and FRDA fibroblasts. A greater stability in expression receives a lower M value.

**Table S1. Molecular and clinical data for FRDA and CTRL fibroblast samples used for RNA Sequencing.**

| Cell Line                            | GAA repeat lengths<br>(allele 1, allele 2) | Age of disease onset<br>(years) | Gender | Age at Sampling<br>(years) | Symptoms |     |     | FXN Normalized DESeq Counts |
|--------------------------------------|--------------------------------------------|---------------------------------|--------|----------------------------|----------|-----|-----|-----------------------------|
|                                      |                                            |                                 |        |                            | C        | D   | H   |                             |
| <b>FRDA</b>                          |                                            |                                 |        |                            |          |     |     |                             |
| F281                                 | 630, 806                                   | 11                              | M      | 19                         | +        | -   | +   | 40.08343355                 |
| F4627                                | 468, 807                                   | 22                              | F      | 50                         | -        | -   | -   | 60.30978005                 |
| F203                                 | 916, 1382                                  | 14                              | F      | 31                         | -        | -   | -   | 46.26690129                 |
| F130                                 | 136, 540                                   | 41                              | M      | 56                         | +        | -   | -   | 86.08670109                 |
| F156                                 | 495, 505                                   | 15                              | M      | 41                         | -        | -   | -   | 45.9628706                  |
| F3665 <sup>1</sup>                   | 816, 1410                                  | ND                              | F      | 13                         | ND       | ND  | ND  | 39.50923754                 |
| F4230                                | 870, 1470                                  | 6                               | F      | 28                         | +        | +   | +   | 29.61076192                 |
| F4192                                | 400, 967                                   | 16                              | M      | 33                         | -        | -   | -   | 53.22397838                 |
| F68                                  | 570, 1200                                  | 7                               | F      | 21                         | +        | -   | +   | 41.14274262                 |
| F4509                                | 211, 1428                                  | 18                              | M      | 36                         | -        | -   | -   | 64.32614921                 |
| F66                                  | 110, 590                                   | 41                              | M      | 70                         | -        | -   | -   | 112.9722268                 |
| F188                                 | 490, 680                                   | 11                              | M      | 47                         | -        | -   | +   | 60.31816612                 |
| F4259                                | 404, 920                                   | 15                              | M      | 37                         | +        | -   | +   | 62.23261322                 |
| F4497                                | 526, 826                                   | 30                              | F      | 44                         | -        | -   | +   | 51.87681863                 |
| F4078 <sup>1</sup>                   | 341, 480                                   | ND                              | M      | 30                         | ND       | ND  | ND  | 94.71514654                 |
| F4654                                | 190, 500                                   | 16                              | M      | 19                         | +        | -   | +   | 68.99572404                 |
| F88                                  | 422, 520                                   | 16                              | F      | 50                         | -        | -   | +   | 57.26501829                 |
| F4675                                | 185, 1130                                  | 4                               | M      | 28                         | -        | -   | -   | 51.50945247                 |
| <b>Mean</b>                          | <b>GAA1=454,<br/>GAA2=898</b>              | <b>17.69</b>                    |        | <b>36.28</b>               |          |     |     | <b>59.24</b>                |
| <b>StdDev</b>                        |                                            |                                 |        | <b>14.73</b>               |          |     |     | <b>20.95</b>                |
| <b>Coefficient of Variation (CV)</b> |                                            |                                 |        | <b>40.6</b>                |          |     |     | <b>35.36</b>                |
| <b>T-test</b>                        |                                            |                                 |        |                            |          |     |     | <b>4.21E-12</b>             |
| <b>CTRL</b>                          |                                            |                                 |        |                            |          |     |     |                             |
| C21808 <sup>1</sup>                  | N/A                                        | N/A                             | M      | 1 day                      | N/A      | N/A | N/A | 161.2991848                 |
| C2671 <sup>1</sup>                   | N/A                                        | N/A                             | F      | 47                         | N/A      | N/A | N/A | 98.08969462                 |
| C2036 <sup>1</sup>                   | N/A                                        | N/A                             | F      | 11                         | N/A      | N/A | N/A | 123.2468382                 |
| C288 <sup>1</sup>                    | N/A                                        | N/A                             | M      | 64                         | N/A      | N/A | N/A | 138.5481289                 |



|                                      |     |     |   |              |     |     |     |               |
|--------------------------------------|-----|-----|---|--------------|-----|-----|-----|---------------|
| C3348 <sup>1</sup>                   | N/A | N/A | M | 10           | N/A | N/A | N/A | 121.0665267   |
| C3652 <sup>1</sup>                   | N/A | N/A | M | 24           | N/A | N/A | N/A | 124.1303539   |
| C3956 <sup>1</sup>                   | N/A | N/A | F | 27           | N/A | N/A | N/A | 149.7992743   |
| C_UF                                 | N/A | N/A | F | 35           | N/A | N/A | N/A | 147.1456236   |
| C7522 <sup>1</sup>                   | N/A | N/A | F | 19           | N/A | N/A | N/A | 147.5246792   |
| C2153 <sup>1</sup>                   | N/A | N/A | M | 40           | N/A | N/A | N/A | 166.8292707   |
| C1650 <sup>1</sup>                   | N/A | N/A | F | 37           | N/A | N/A | N/A | 118.7702431   |
| C7492 <sup>1</sup>                   | N/A | N/A | M | 17           | N/A | N/A | N/A | 121.9659664   |
| C8399 <sup>1</sup>                   | N/A | N/A | F | 19           | N/A | N/A | N/A | 125.6609057   |
| C_UM                                 | N/A | N/A | M | 39           | N/A | N/A | N/A | 178.3088782   |
| C2169 <sup>1</sup>                   | N/A | N/A | M | 52           | N/A | N/A | N/A | 102.1403775   |
| C7525 <sup>1</sup>                   | N/A | N/A | F | 22           | N/A | N/A | N/A | 133.8142106   |
| C5879 <sup>1</sup>                   | N/A | N/A | F | 48           | N/A | N/A | N/A | 145.6948052   |
| <b>Mean</b>                          |     |     |   | <b>31.94</b> |     |     |     | <b>135.53</b> |
| <b>StdDev</b>                        |     |     |   | <b>15.77</b> |     |     |     | <b>21.85</b>  |
| <b>Coefficient of Variation (CV)</b> |     |     |   | <b>49.37</b> |     |     |     | <b>16.12</b>  |

ND - not determined

<sup>1</sup> - denotes fibroblast cell line obtained from Coriell Cell Repositories

**Table S2.** List of differentially expressed genes (FDR<0.05) and log2 ratio expression values as determined by RNA sequencing for FRDA and CTRL fibroblast samples.

[Click here to Download Table S2](#)

**Table S3.** Pathways that are significantly enriched as revealed by the KEGG 2016 and WikiPathways 2016 databases when the list of differentially expressed genes in fibroblasts (FDR<0.05) is used as input in the Enrichr platform (Chen et al., 2013; Kuleshov et al., 2016).

[Click here to Download Table S3](#)



**Table S4. Genes that were found to be differentially expressed in both FRDA fibroblasts and blood cells.**

| Symbol                                                | Name                                                                     | Function                                                             | Agreement between datasets |
|-------------------------------------------------------|--------------------------------------------------------------------------|----------------------------------------------------------------------|----------------------------|
| <b>Hayashi, et al. (2016) PLoS One 11.</b>            |                                                                          |                                                                      |                            |
| PRDX2                                                 | Peroxiredoxin 2                                                          | Antioxidant                                                          | Yes                        |
| PRDX5                                                 | Peroxiredoxin 5                                                          | Antioxidant                                                          | Yes                        |
| RNF7                                                  | Ring Finger Protein 7                                                    | Ubiquitination                                                       | Yes                        |
| PREX1                                                 | Phosphatidylinositol-3,4,5-Trisphosphate Dependent Rac Exchange Factor 1 | Guanine nucleotide exchange factor                                   | Yes                        |
| <b>Coppola, et al. (2011) Ann Neurol 70: 790-804.</b> |                                                                          |                                                                      |                            |
| CBS                                                   | Cystathionine-Beta-Synthase                                              | Transsulfuration reactions                                           | Yes                        |
| TCEB2                                                 | Transcription Elongation Factor B Subunit 2                              | Transcription elongation                                             | No                         |
| ZFYVE26                                               | Zinc Finger FYVE-Type Containing 26                                      | Transcription regulation                                             | Yes                        |
| SLC23A2                                               | Solute Carrier Family 23 Member 2                                        | Tissue-specific Vitamin C uptake                                     | Yes                        |
| ABCA1                                                 | ATP Binding Cassette Subfamily A Member 1                                | Membrane cholesterol transporter                                     | Yes                        |
| SLC37A2                                               | Solute Carrier Family 37 Member 2                                        | Inorganic phosphate and glucose-6-phosphate antiporter               | Yes                        |
| CTSS                                                  | Cathepsin S                                                              | Cysteine protease                                                    | Yes                        |
| PBK                                                   | PDZ Binding Kinase                                                       | Serine/threonine protein kinase                                      | No                         |
| <b>Haugen, et al. (2010) PLoS Genet 6.</b>            |                                                                          |                                                                      |                            |
| MEIS2                                                 | Meis Homeobox 2                                                          | Transcription regulator                                              | No adults; Yes children    |
| F3                                                    | Coagulation Factor III, Tissue Factor                                    | Blood coagulation                                                    | No                         |
| SSBP2                                                 | Single Stranded DNA Binding Protein 2                                    | Genome stability maintenance                                         | Yes                        |
| ZZZ3                                                  | Zinc Finger ZZ-Type Containing 3                                         | Chromatin regulation                                                 | Yes                        |
| CTBP2                                                 | C-Terminal Binding Protein 2                                             | Isoform 1: Transcription regulation<br>Isoform 2: Synapse regulation | Yes                        |
| PHF3                                                  | PHD Finger Protein 3                                                     | Transcription regulation                                             | Yes                        |
| TUBGCP3                                               | Tubulin Gamma Complex Associated Protein 3                               | Microtubule organization at the centrosome                           | No                         |
| NUP153                                                | Nucleoporin 153                                                          | Nucleocytoplasmic transport                                          | No                         |
| NCOA3                                                 | Nuclear Receptor Coactivator 3                                           | Transcription activation and histone acetylation                     | No adults; Yes children    |
| ZMYND8                                                | Zinc Finger MYND-Type Containing 8                                       | Receptor activity                                                    | No                         |
| TOPBP1                                                | Topoisomerase (DNA) II Binding Protein 1                                 | DNA replication                                                      | Yes                        |
| ZMIZ1                                                 | Zinc Finger MIZ-Type Containing 1                                        | Transcription regulation                                             | No                         |
| RBPJ                                                  | Recombination Signal Binding Protein For Immunoglobulin Kappa J Region   | Transcription regulation                                             | Yes                        |
| CENPA                                                 | Centromere Protein A                                                     | Centromere chromatin structure                                       | Yes                        |
| KIF14                                                 | Kinesin Family Member 14                                                 | Microtubule motor activity                                           | Yes                        |

**Table S5.** Lists of significantly changed genes and log<sub>2</sub> ratio expression values for those overlapping between the fibroblast dataset (FDR<0.05) and datasets published in (Coppola et al., 2011; Haugen et al., 2010; Hayashi and Cortopassi, 2016).

[Click here to Download Table S5](#)
